# Supplementary material for: Absorption spectra of pyruvic acid in water: insights from calculations for small hydrates and comparison to experiment
Source: Royal Society of Chemistry journal article supplement (doi:10.1039/d0cp01810d), 2020-01-01
Supplement: d0cp01810d1.pdf [file d0cp01810d1.pdf]

# Supporting Information for:

## Absorption Spectra of Pyruvic Acid in Water: Insights from Calculations for Small Hydrates and Comparison to Experiment

Dorit Shemesh<sup>1</sup>, Man Luo<sup>2</sup>, Vicki H. Grassian<sup>2</sup>, R. Benny Gerber<sup>1,3</sup>

<sup>1</sup>Institute of Chemistry, Fritz Haber Research Center, Hebrew University of Jerusalem, Jerusalem  
91904, Israel

<sup>2</sup>Department of Chemistry, University of California, San Diego, CA 92093, USA

<sup>3</sup>Department of Chemistry, University of California, Irvine, CA 92697, USA

1. Effect of hydration on the vertical excitation energies to the first excited singlet state of the two diol forms (anionic and ketone)

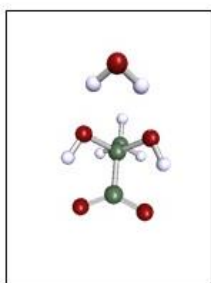

Anion diol + H<sub>2</sub>O  
Conformer 1

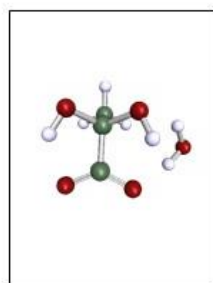

Anion diol + H<sub>2</sub>O  
Conformer 2

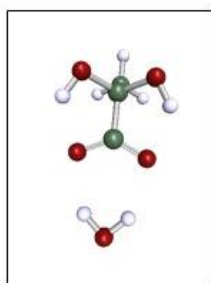

Anion diol + H<sub>2</sub>O  
Conformer 3

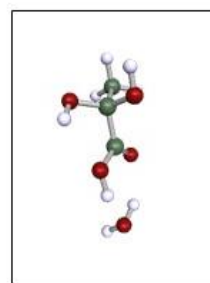

Ketone diol + H<sub>2</sub>O  
Conformer 1

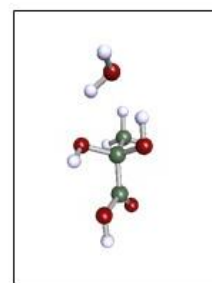

Ketone diol + H<sub>2</sub>O  
Conformer 2

| Geometry                      | Energy (eV) | Energy (nm) | Description | Oscillator strength | Dipole moment (Debye) |
|-------------------------------|-------------|-------------|-------------|---------------------|-----------------------|
| Anion diol + H <sub>2</sub> O | 6.11        | 203         | $n\pi^*$    | 0.00010469          | 1.70                  |

|                                            |      |     |          |            |      |
|--------------------------------------------|------|-----|----------|------------|------|
| Conformer 1                                |      |     |          |            |      |
| Anion diol + H <sub>2</sub> O Conformer 2  | 6.03 | 206 | $n\pi^*$ | 0.00037199 | 2.18 |
| Anion diol + H <sub>2</sub> O Conformer 3  | 6.20 | 200 | $n\pi^*$ | 0.00007862 | 1.84 |
| Ketone diol + H <sub>2</sub> O Conformer 1 | 5.77 | 215 | $n\pi^*$ | 0.00166720 | 2.72 |
| Ketone diol + H <sub>2</sub> O Conformer 2 | 5.70 | 218 | $n\pi^*$ | 0.00111908 | 1.81 |

The first excited state of the anion diol is at 213 nm, see Table 4 in the manuscript. Hydration of the anion diol was simulated by adding the water molecule at three different locations of the anion diol. The calculated vertical excitation energies are shifted only slightly, and do therefore not fall above 290 nm, the experimentally and atmospherically relevant region. The same is true for the ketone diol. The first excited state of the ketone diol is at 218 nm. The hydration affects the vertical excitation energies even less than for the anion diol. The monohydrated ketone diol absorbs at 215 nm or 218 nm depending on the location of the water molecule.

## 2. Tit conformer with two water molecules

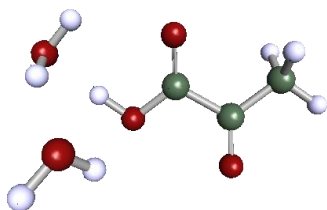

| State | Energy (eV) | Energy (nm) | Description | Oscillator strength | Dipole moment (Debye) |
|-------|-------------|-------------|-------------|---------------------|-----------------------|
| S1    | 3.42        | 362         | $n\pi^*$    | 0.00000340          | 2.06                  |
| S2    | 5.24        | 237         | $n\pi^*$    | 0.00020717          | 3.24                  |

The Tt conformer with two water molecules is lower in energy by about 0.2 eV than the Tc conformer with two water molecules. However, to be consistent with the other clusters sizes we have depicted in the manuscript the Tc conformer. The excitation energy for the first excited state is tabulated here, and the difference in excitation energy is only 3 nm (359 nm vs. 362 nm) between the two different conformers.

### 3. Comparison of vertical excitation energy and properties using different basis sets

Tc conformer of pyruvic acid, MP2/def-SV(P) optimization, ADC(2)/def-SV(P) excitation

| State | Energy (eV) | Energy (nm) | Description | Oscillator strength | Dipole moment (Debye) |
|-------|-------------|-------------|-------------|---------------------|-----------------------|
| S1    | 3.53        | 351         | npi*        | 0.00000355          | 2.03                  |
| S2    | 5.37        | 231         | npi*        | 0.00055507          | 1.33                  |

Tc conformer of pyruvic acid, MP2/cc-pVDZ optimization, ADC(2)/cc-pVDZ excitation

| State | Energy (eV) | Energy (nm) | Description | Oscillator strength | Dipole moment (Debye) |
|-------|-------------|-------------|-------------|---------------------|-----------------------|
| S1    | 3.47        | 357         | npi*        | 0.00000035          | 1.86                  |
| S2    | 5.28        | 235         | npi*        | 0.00044061          | 1.33                  |

Anion, MP2/def-SV(P) optimization, ADC(2)/def-SV(P) excitation

| State | Energy (eV) | Energy (nm) | Description | Oscillator strength | Dipole moment (Debye) |
|-------|-------------|-------------|-------------|---------------------|-----------------------|
| S1    | 3.25        | 382         | npi*        | 0.00004174          | 12.78                 |
| S2    | 3.89        | 319         | npi*        | 0.00000669          | 9.35                  |

Anion, MP2/cc-pVDZ optimization, ADC(2)/cc-pVDZ excitation

| State | Energy (eV) | Energy (nm) | Description | Oscillator strength | Dipole moment (Debye) |
|-------|-------------|-------------|-------------|---------------------|-----------------------|
| S1    | 3.18        | 390         | $n\pi^*$    | 0.00000638          | 12.58                 |
| S2    | 3.80        | 327         | $n\pi^*$    | 0.00000407          | 9.22                  |

The different basis sets predict similarly the first two excitation energies, differing only by maximal 10 nanometers. The excited states have the same descriptions in terms of orbital transitions, and the oscillator strengths and dipole moments show the same trend.

#### 4. Molecular orbitals

Tc conformer

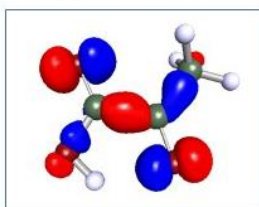

HOMO

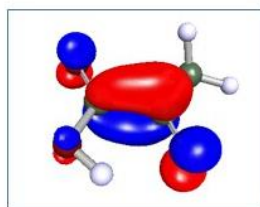

LUMO

Tt conformer

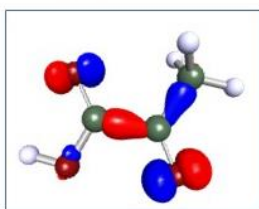

HOMO

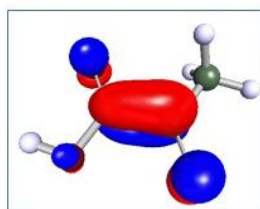

LUMO

Highest occupied molecular orbital (HOMO) and lowest occupied molecular orbital (LUMO) for the Tc and the Tt conformer of pyruvic acid.

Anion

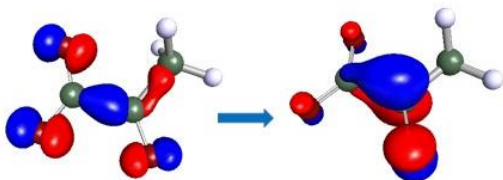

Anion + 4 Water molecules

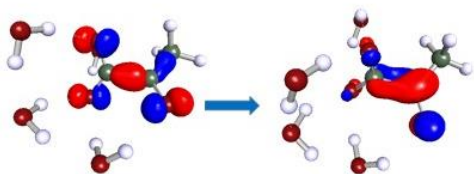

Orbitals involved in the first excitation transition of the anion and the anion cluster with 4 water molecules.

## 5. Cartesian coordinates

### Tc conformer

|   |            |            |            |
|---|------------|------------|------------|
| C | 1.3917787  | -0.0000013 | -0.5770865 |
| C | 0.0363784  | -0.0000118 | 0.0659895  |
| O | -1.0344907 | -0.0000312 | -0.5350214 |
| C | 0.0014661  | 0.0000047  | 1.6101654  |
| O | -1.2509833 | -0.0000101 | 2.0884458  |
| O | 1.0033181  | 0.0000420  | 2.2936445  |
| H | -1.8118524 | -0.0000067 | 1.2843745  |
| H | 1.2914039  | 0.0000117  | -1.6703250 |
| H | 1.9569699  | 0.8824061  | -0.2362773 |
| H | 1.9569603  | -0.8824245 | -0.2362996 |

### Tt conformer

|   |            |            |            |
|---|------------|------------|------------|
| C | 0.0112009  | 0.0000087  | 0.0526507  |
| C | 0.0074840  | 0.0000106  | 1.5944285  |
| C | 1.3886314  | -0.0000060 | -0.5618872 |
| O | -1.0354403 | 0.0000197  | -0.5740340 |
| O | 1.0264243  | 0.0000432  | 2.2606029  |
| O | -1.2402505 | -0.0000250 | 2.0954888  |

|   |            |            |            |
|---|------------|------------|------------|
| H | -1.1187265 | -0.0000219 | 3.0628397  |
| H | 1.3028511  | -0.0000046 | -1.6566544 |
| H | 1.9507924  | 0.8831261  | -0.2178721 |
| H | 1.9507732  | -0.8831507 | -0.2178728 |

#### Anion

|   |            |            |            |
|---|------------|------------|------------|
| C | 0.0021935  | 0.0000060  | 0.0640691  |
| C | 0.0119912  | 0.0000144  | 1.5944708  |
| O | 1.0770557  | 0.0000094  | 2.2083258  |
| C | -1.4111420 | 0.0000278  | 2.2711964  |
| O | -1.4164704 | 0.0000551  | 3.5237334  |
| O | -2.3530571 | 0.0000082  | 1.4270903  |
| H | 1.0352980  | -0.0000042 | -0.3232995 |
| H | -0.5568022 | -0.8777003 | -0.2974421 |
| H | -0.5567878 | 0.8777175  | -0.2974522 |

#### Ketone diol

|   |            |            |            |
|---|------------|------------|------------|
| O | 0.5897677  | 1.7460832  | 1.8338009  |
| C | -0.0841570 | 0.8237784  | 1.4294224  |
| O | -0.9756877 | 0.1436488  | 2.1946080  |
| H | -0.9386554 | 0.5679333  | 3.0706778  |
| C | -0.0637714 | 0.2470353  | 0.0040880  |
| O | -0.0112170 | -1.1583250 | 0.0391927  |
| H | -0.7602911 | -1.4252117 | 0.5963652  |
| O | -1.2788608 | 0.7083367  | -0.5554129 |
| C | 1.1510490  | 0.7276584  | -0.7662500 |
| H | 2.0762130  | 0.3974388  | -0.2722690 |
| H | 1.1207806  | 0.2977324  | -1.7806562 |
| H | 1.1433985  | 1.8243156  | -0.8250701 |
| H | -1.2777894 | 0.3810959  | -1.4685887 |

#### Anion diol

|   |            |            |            |
|---|------------|------------|------------|
| C | 0.6862928  | 1.8437524  | 1.8352727  |
| C | -0.2565258 | 0.7556449  | 1.3763841  |
| O | -1.1880792 | 0.4905481  | 2.4273613  |
| C | 0.3947112  | -0.6084982 | 0.9984257  |
| O | -0.5136807 | -1.4271271 | 0.6172643  |
| O | 1.6302436  | -0.7574719 | 1.0975283  |
| O | -0.9534465 | 1.2147016  | 0.2175498  |
| H | -1.2421553 | 0.3497386  | -0.1347973 |
| H | 1.4117675  | 2.0590328  | 1.0371554  |

|   |            |            |           |
|---|------------|------------|-----------|
| H | 0.1161056  | 2.7575457  | 2.0775821 |
| H | 1.2347968  | 1.5004358  | 2.7245206 |
| H | -1.4949900 | -0.3910146 | 2.1392351 |

Anion ketone + H<sub>2</sub>O

|   |            |            |            |
|---|------------|------------|------------|
| C | 1.4052394  | 0.0169782  | -0.6353602 |
| C | -0.0168970 | -0.0052992 | -0.0869626 |
| O | -0.9856267 | -0.0159048 | -0.8393139 |
| C | -0.1272686 | -0.0132539 | 1.4736161  |
| O | -1.2908864 | -0.0311517 | 1.9443788  |
| O | 0.9993529  | -0.0001840 | 2.0551479  |
| H | 1.3857681  | 0.0212392  | -1.7363523 |
| H | 1.9339125  | 0.9002336  | -0.2462904 |
| H | 1.9585635  | -0.8542497 | -0.2535172 |
| O | -0.2471458 | -0.0251946 | 4.6008168  |
| H | 0.4832281  | -0.0135732 | 3.9538794  |
| H | -0.9442901 | -0.0326639 | 3.9196494  |

Anion + 2 H<sub>2</sub>O

|   |            |            |            |
|---|------------|------------|------------|
| C | 1.6054691  | 0.0505462  | -0.6262841 |
| C | 0.1658758  | -0.0743611 | -0.1551026 |
| O | -0.7521117 | -0.1711924 | -0.9659730 |
| C | -0.0259036 | -0.0679905 | 1.3972449  |
| O | -1.2061785 | -0.1692162 | 1.8293979  |
| O | 1.0598720  | 0.0410155  | 2.0307789  |
| H | 1.6431506  | 0.0371053  | -1.7258332 |
| H | 2.0416400  | 0.9781279  | -0.2265693 |
| H | 2.2020978  | -0.7695126 | -0.1997232 |
| O | -0.2501137 | -0.0361873 | 4.5574723  |
| H | 0.4843070  | 0.0192782  | 3.9194931  |
| H | -0.9439712 | -0.1109476 | 3.8807151  |
| H | -2.8240169 | -0.3323210 | 0.8834965  |
| O | -3.4748920 | -0.4036967 | 0.1587485  |
| H | -2.8350858 | -0.3563508 | -0.5638807 |

Anion + 3 H<sub>2</sub>O

|   |            |            |            |
|---|------------|------------|------------|
| C | 1.6202467  | 0.1071964  | -0.6474156 |
| C | 0.1902539  | -0.0789907 | -0.1767306 |
| O | -0.6100660 | -0.7521221 | -0.8265109 |
| C | -0.1426390 | 0.5500005  | 1.2003840  |

|   |            |            |            |
|---|------------|------------|------------|
| O | -1.2860520 | 1.0764861  | 1.3311405  |
| O | 0.7933257  | 0.4330559  | 2.0296621  |
| H | 1.7705080  | -0.3855999 | -1.6190499 |
| H | 1.8457746  | 1.1837978  | -0.7242196 |
| H | 2.2936508  | -0.3008016 | 0.1196770  |
| O | -0.2119068 | -0.9453598 | 4.3999869  |
| H | 0.2314697  | -0.4256847 | 3.7083465  |
| H | -1.1362257 | -0.8568923 | 4.1124069  |
| H | -2.7488735 | 0.2100128  | 0.6222742  |
| O | -3.2674477 | -0.5930525 | 0.4076334  |
| H | -2.5547105 | -1.0624218 | -0.0530568 |
| O | -2.7873311 | -0.2050929 | 3.2720197  |
| H | -3.0510823 | -0.6533400 | 2.4493501  |
| H | -2.2173128 | 0.4821108  | 2.8746281  |

Anion + 4 H<sub>2</sub>O

|   |            |            |            |
|---|------------|------------|------------|
| C | 1.3307845  | 0.2866572  | -0.8741412 |
| C | 0.0633716  | -0.2692164 | -0.2611862 |
| O | -0.5406683 | -1.2258051 | -0.7464882 |
| C | -0.3588919 | 0.4475415  | 1.0332852  |
| O | -1.5386825 | 0.9142640  | 1.0737092  |
| O | 0.5645014  | 0.5442762  | 1.8806076  |
| H | 1.5076054  | -0.1486351 | -1.8681384 |
| H | 1.2478661  | 1.3845995  | -0.9155386 |
| H | 2.1655958  | 0.0587754  | -0.1935706 |
| O | -0.2764643 | -0.4462717 | 4.5147664  |
| H | 0.1176490  | -0.0407341 | 3.7255862  |
| H | -1.1957403 | -0.5402822 | 4.2131366  |
| H | -2.8604360 | -0.3367210 | 0.5444725  |
| O | -3.1804048 | -1.2588018 | 0.5033435  |
| H | -2.3744568 | -1.6484438 | 0.1272101  |
| O | -2.8702547 | -0.2839585 | 3.2315715  |
| H | -3.0235408 | -0.9026111 | 2.4955473  |
| H | -2.4122689 | 0.4183410  | 2.7335578  |
| O | 0.2815060  | 3.2738782  | 0.7372936  |
| H | 0.7114694  | 2.6558153  | 1.3494361  |
| H | -0.5995809 | 2.8672247  | 0.7333537  |

Anion + 5 H<sub>2</sub>O

|   |            |            |           |
|---|------------|------------|-----------|
| C | -1.1510909 | 0.7332814  | 0.9000277 |
| H | -0.6585808 | -0.1715139 | 0.5163835 |
| H | -0.4448591 | 1.3325507  | 1.4977447 |



|   |            |           |            |
|---|------------|-----------|------------|
| H | -1.9877746 | 0.4799723 | 1.5667613  |
| C | -1.6783007 | 1.5683137 | -0.2488523 |
| O | -1.5881695 | 1.1817677 | -1.4128699 |
| C | -2.3748989 | 2.8914510 | 0.1608595  |
| O | -2.1974012 | 3.8924367 | -0.5823469 |
| O | -3.0411117 | 2.7864911 | 1.2303278  |
| O | -5.1731682 | 4.4964442 | 1.9079878  |
| H | -5.6850788 | 3.7889793 | 1.4660649  |
| H | -4.2942360 | 4.0699463 | 1.8624577  |
| O | -5.8086912 | 2.1831036 | 0.4272963  |
| H | -5.6860810 | 2.5958579 | -0.4597638 |
| H | -4.8855102 | 2.0991974 | 0.7162096  |
| O | -5.3420460 | 3.5551493 | -1.9147785 |
| H | -4.5369261 | 3.3290717 | -2.4197382 |
| H | -5.0734033 | 4.3958549 | -1.4825707 |
| H | -2.4807621 | 2.2620708 | -2.8837315 |
| O | -2.7864611 | 3.1336900 | -3.1833340 |
| H | -2.4581739 | 3.6426682 | -2.4161766 |
| H | -3.4935541 | 5.2274759 | -0.4455282 |
| O | -4.3366438 | 5.7241522 | -0.4657660 |
| H | -4.7204597 | 5.4529125 | 0.3948318  |

Ketone + H<sub>2</sub>O

|   |            |            |            |
|---|------------|------------|------------|
| C | 1.3546229  | -0.0347475 | -0.5366834 |
| C | -0.0357912 | 0.0095714  | 0.0327544  |
| C | -0.1038423 | 0.0008624  | 1.5787266  |
| O | 0.9285426  | -0.0868593 | 2.2180125  |
| O | -1.0472426 | 0.0421790  | -0.6612507 |
| O | -1.3048353 | 0.0815221  | 2.1396681  |
| H | -2.0390526 | 0.1618316  | 1.4778544  |
| H | 1.3065243  | -0.0310827 | -1.6327151 |
| H | 1.9300980  | 0.8277363  | -0.1675866 |
| H | 1.8750277  | -0.9316989 | -0.1689207 |
| O | -3.5212145 | 0.2777262  | 0.5940047  |
| H | -3.0287016 | 0.2235316  | -0.2398655 |
| H | -4.0127724 | -0.5543442 | 0.6161715  |

Ketone + 2 H<sub>2</sub>O (Tc conformer)

|   |            |            |            |
|---|------------|------------|------------|
| C | -2.3026529 | 0.3518473  | -0.0927808 |
| C | -0.8499465 | 0.3618995  | -0.4745509 |
| O | -0.2535970 | 1.3616295  | -0.8591441 |
| C | -0.1323052 | -1.0012127 | -0.3391476 |

|   |            |            |            |
|---|------------|------------|------------|
| O | 1.1417793  | -1.0637969 | -0.7043952 |
| O | -0.7486430 | -1.9590953 | 0.0984156  |
| H | 1.5030319  | -0.2005715 | -1.0493352 |
| H | -2.7243014 | 1.3570136  | -0.2159016 |
| H | -2.8418692 | -0.3771334 | -0.7167140 |
| H | -2.4084177 | 0.0064515  | 0.9466348  |
| O | 2.4010056  | 1.0870364  | -1.6577261 |
| H | 3.0819613  | 1.4141533  | -1.0543385 |
| H | 1.6792537  | 1.7263436  | -1.5570612 |
| O | 1.4857005  | -3.9878419 | 0.2112156  |
| H | 0.5915631  | -3.6308759 | 0.2986275  |
| H | 1.9131706  | -3.2450251 | -0.2314133 |

Ketone + 2 H<sub>2</sub>O (Tt conformer)

|   |            |            |            |
|---|------------|------------|------------|
| C | 1.6925223  | -0.3015947 | -0.3220594 |
| C | 0.3667315  | 0.3987115  | -0.1717993 |
| O | -0.2359879 | 0.9509862  | -1.0782139 |
| C | -0.2281549 | 0.3499638  | 1.2481820  |
| O | -1.2870790 | 1.1452179  | 1.3895384  |
| O | 0.2444906  | -0.3706206 | 2.1178726  |
| H | -1.6171135 | 0.9936168  | 2.3345109  |
| H | 2.0330155  | -0.2289026 | -1.3625590 |
| H | 2.4319723  | 0.1511833  | 0.3569930  |
| H | 1.5927391  | -1.3545203 | -0.0179172 |
| O | -2.1976370 | 0.2950346  | 3.6773594  |
| H | -1.4274246 | -0.2866953 | 3.7774636  |
| H | -2.8075437 | -0.2468822 | 3.1367887  |
| H | -3.1112438 | -0.0919596 | 0.9215296  |
| O | -3.5765081 | -0.7250654 | 1.4897470  |
| H | -4.5065267 | -0.5230423 | 1.3253538  |

Ketone + 3 H<sub>2</sub>O

|   |            |            |            |
|---|------------|------------|------------|
| C | -3.0681335 | -0.4658624 | 0.4161748  |
| C | -1.6229146 | -0.2011241 | 0.1010146  |
| C | -1.2279956 | 1.2893957  | 0.0281772  |
| O | -1.9559922 | 2.1288107  | 0.5273499  |
| O | -0.7852753 | -1.0848175 | -0.0467396 |
| O | -0.0674042 | 1.5642357  | -0.5504984 |
| O | 1.4468572  | 0.0315178  | -1.8919728 |
| O | 1.9104989  | -2.1408185 | -0.2434305 |
| O | 2.6351940  | 2.4453550  | -1.1167944 |
| H | 0.3765843  | 0.7728283  | -1.0185205 |

|   |            |            |            |
|---|------------|------------|------------|
| H | -3.2458281 | -1.5465607 | 0.4806554  |
| H | -3.3326338 | 0.0362073  | 1.3583984  |
| H | -3.7018153 | -0.0153080 | -0.3640128 |
| H | 2.1255480  | 0.7272465  | -1.7945775 |
| H | 1.7976542  | -0.7294649 | -1.3858812 |
| H | 1.8048266  | -2.9584997 | -0.7475069 |
| H | 0.9999686  | -1.9463540 | 0.0313605  |
| H | 3.0124500  | 2.3710236  | -0.2303150 |
| H | 1.7132978  | 2.6787584  | -0.9225672 |

#### Ketone + 4 H<sub>2</sub>O

|   |            |           |            |
|---|------------|-----------|------------|
| C | -2.7698378 | 1.2732242 | -1.2241083 |
| C | -1.3541667 | 1.7178903 | -0.9912449 |
| C | -1.1097043 | 3.2379932 | -1.0638858 |
| O | -1.9878633 | 4.0045484 | -0.7091351 |
| O | -0.4411228 | 0.9537784 | -0.6836283 |
| O | 0.1026161  | 3.6203866 | -1.4477179 |
| O | 1.6913802  | 2.0366592 | -2.6041252 |
| O | 3.5948969  | 3.4423893 | -1.3978659 |
| O | 2.2850284  | 1.3956510 | 0.1544021  |
| O | 1.9973097  | 5.6740609 | -0.8636991 |
| H | 0.6669063  | 2.8708298 | -1.8864874 |
| H | -2.8562187 | 0.1890160 | -1.0732682 |
| H | -3.4350290 | 1.8266719 | -0.5433221 |
| H | -3.0716279 | 1.5436843 | -2.2502795 |
| H | 3.3680662  | 2.9031457 | -0.6216171 |
| H | 3.1755713  | 4.3047489 | -1.1934697 |
| H | 2.4885149  | 2.5845877 | -2.3582799 |
| H | 1.8484822  | 1.2513516 | -2.0575580 |
| H | 2.4675031  | 0.6597164 | 0.7516687  |
| H | 1.3188704  | 1.3617235 | 0.0480460  |
| H | 1.8505043  | 5.8805855 | 0.0687141  |
| H | 1.1742664  | 5.2161413 | -1.1091344 |

#### Anion diol + H<sub>2</sub>O Conformer 1

|   |            |            |            |
|---|------------|------------|------------|
| C | -1.9718656 | 0.1336021  | 0.1484848  |
| C | -0.4511496 | 0.0521079  | 0.0720844  |
| O | 0.0740973  | 1.3533997  | -0.1397217 |
| C | 0.0497826  | -0.8396677 | -1.1104629 |
| O | 0.2541156  | -0.2123036 | -2.1851084 |
| O | 0.2236112  | -2.0521246 | -0.8106634 |
| O | 0.0438443  | -0.5303591 | 1.2679213  |

|   |            |            |            |
|---|------------|------------|------------|
| H | 0.3118157  | -1.4039248 | 0.8911471  |
| H | -2.3915037 | -0.8747991 | 0.2925806  |
| H | -2.2612167 | 0.7735856  | 0.9987308  |
| H | -2.3682356 | 0.5660934  | -0.7840328 |
| H | 0.3546450  | 1.2338025  | -1.0799061 |
| O | 1.5026036  | 1.6979289  | 2.3162527  |
| H | 1.1828728  | 1.9430431  | 1.4333144  |
| H | 1.1647842  | 0.7883478  | 2.2944633  |

Anion diol + H<sub>2</sub>O Conformer 2

|   |            |            |            |
|---|------------|------------|------------|
| C | -1.6516361 | 0.2034358  | 0.4478872  |
| C | -0.1942242 | -0.0732804 | 0.8096322  |
| O | 0.5119945  | 1.1637716  | 0.8339510  |
| C | 0.5016448  | -1.0136917 | -0.2286013 |
| O | 1.0583682  | -0.4289938 | -1.2082998 |
| O | 0.4627816  | -2.2357832 | 0.0608063  |
| O | -0.1357827 | -0.7106113 | 2.0670642  |
| H | 0.1076260  | -1.6127556 | 1.7607236  |
| H | -2.2053223 | -0.7484383 | 0.4148296  |
| H | -2.0962195 | 0.8469473  | 1.2261369  |
| H | -1.7163680 | 0.7083315  | -0.5267240 |
| H | 1.1691409  | 0.9993364  | 0.1288670  |
| O | -0.1045595 | 2.0474333  | -1.9281224 |
| H | -0.1533017 | 2.2309288  | -0.9791838 |
| H | 0.2910889  | 1.1522146  | -1.8711468 |

Anion diol + H<sub>2</sub>O Conformer 3

|   |            |            |            |
|---|------------|------------|------------|
| C | -1.9277616 | 0.6857313  | 0.9297494  |
| C | -0.3987590 | 0.6576308  | 0.9141418  |
| O | 0.0914496  | 1.9709815  | 0.7438066  |
| C | 0.1315926  | -0.2156491 | -0.2610249 |
| O | 0.3378993  | 0.4094086  | -1.3411014 |
| O | 0.3156609  | -1.4351440 | 0.0195971  |
| O | 0.0711001  | 0.1010236  | 2.1240504  |
| H | 0.3497336  | -0.7787743 | 1.7943090  |
| H | -2.3203182 | -0.3364337 | 1.0533270  |
| H | -2.2680735 | 1.3108662  | 1.7718653  |
| H | -2.3046606 | 1.1106088  | -0.0145135 |
| H | 0.3802330  | 1.9106863  | -0.1907782 |
| O | 1.2806361  | -1.9672362 | -2.6166523 |
| H | 1.0362298  | -2.1781399 | -1.6981693 |
| H | 1.0500609  | -1.0237459 | -2.5496589 |

Ketone diol + H<sub>2</sub>O Conformer 1

|   |            |            |            |
|---|------------|------------|------------|
| O | -1.0890466 | 0.8878651  | -0.2050594 |
| C | 0.0012193  | 0.4401343  | 0.1233940  |
| O | 1.0808005  | 1.1768961  | 0.3993527  |
| H | 0.8092170  | 2.1317038  | 0.2924984  |
| C | 0.3001648  | -1.0590663 | 0.2814173  |
| O | 1.5648677  | -1.3701143 | -0.2442686 |
| H | 2.1683475  | -0.7263019 | 0.1603764  |
| O | 0.2579363  | -1.2479880 | 1.6834516  |
| C | -0.7185743 | -1.9136227 | -0.4458005 |
| H | -0.6996419 | -1.7034462 | -1.5241552 |
| H | -0.4670256 | -2.9745616 | -0.2914428 |
| H | -1.7222777 | -1.7076210 | -0.0536667 |
| H | 0.4468698  | -2.1894594 | 1.8169334  |
| O | -0.1311181 | 3.5076789  | -0.0447169 |
| H | 0.0034062  | 3.8394661  | -0.9430923 |
| H | -0.8709120 | 2.8804650  | -0.1550896 |

Ketone diol + H<sub>2</sub>O Conformer 2

|   |            |            |            |
|---|------------|------------|------------|
| O | -2.3211791 | 1.1783204  | 0.0419124  |
| C | -1.1182295 | 1.2598121  | 0.1513332  |
| O | -0.4521623 | 2.4299624  | 0.3291691  |
| H | -1.1413040 | 3.1170795  | 0.3546904  |
| C | -0.1257995 | 0.0893683  | 0.1158392  |
| O | 0.9611824  | 0.4238934  | -0.7510499 |
| H | 1.2770152  | 1.2829715  | -0.4240058 |
| O | 0.3063228  | -0.0494270 | 1.4407148  |
| C | -0.7702315 | -1.1648470 | -0.4408193 |
| H | -1.0996483 | -1.0036433 | -1.4766291 |
| H | -0.0395810 | -1.9858212 | -0.4123057 |
| H | -1.6388529 | -1.4270499 | 0.1765373  |
| H | 0.9621382  | -0.7767345 | 1.4078079  |
| O | 2.3020412  | -1.7472441 | 0.5010032  |
| H | 3.2112637  | -1.6228342 | 0.8010206  |
| H | 2.1922336  | -1.0606345 | -0.1813843 |
